# Supplementary material for: High-performance gas sensing achieved by mesoporous tungsten oxide mesocrystals with increased oxygen vacancies
Source: Royal Society of Chemistry journal article supplement (doi:10.1039/c3ta11506b), 2013-01-01
Supplement: c3ta11506b.pdf [file c3ta11506b.pdf]

## **High-performance gas sensing achieved by mesoporous tungsten oxide mesocrystals with increased oxygen vacancies**

Dong Wang<sup>a,b</sup>, Jianbo Sun<sup>c</sup>, Xuan Cao<sup>a</sup>, Yihan Zhu<sup>d</sup>, Qingxiao Wang<sup>d</sup>, Guangchao Wang<sup>d</sup>, Yu Han<sup>d</sup>, Geyu Lu<sup>c</sup>, Guangsheng Pang,<sup>\*a</sup> and Shouhua Feng<sup>a</sup>

\* To whom correspondence should be addressed

Email: [panggs@jlu.edu.cn](mailto:panggs@jlu.edu.cn)

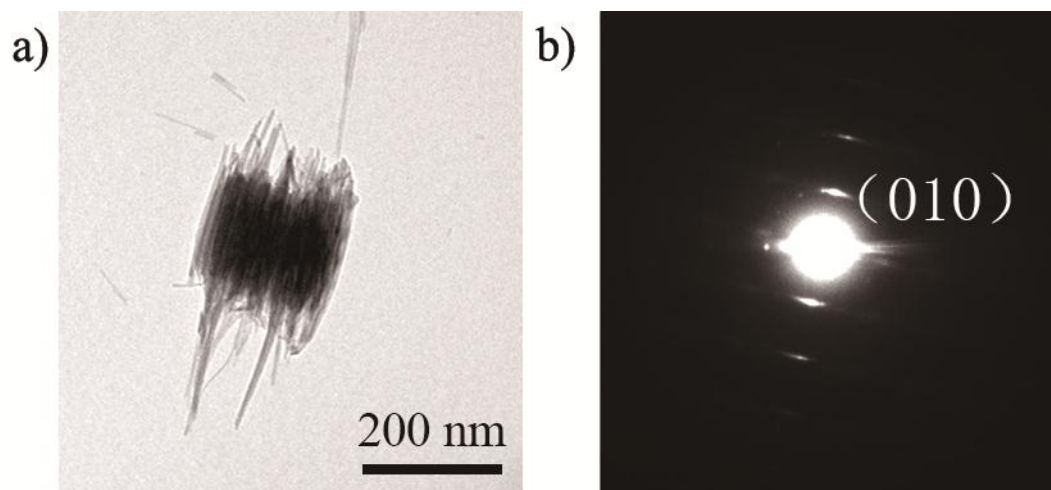

**Figure S1.** a) TEM image of an individual tungsten oxide mesocrystal. b) its corresponding SAED pattern.

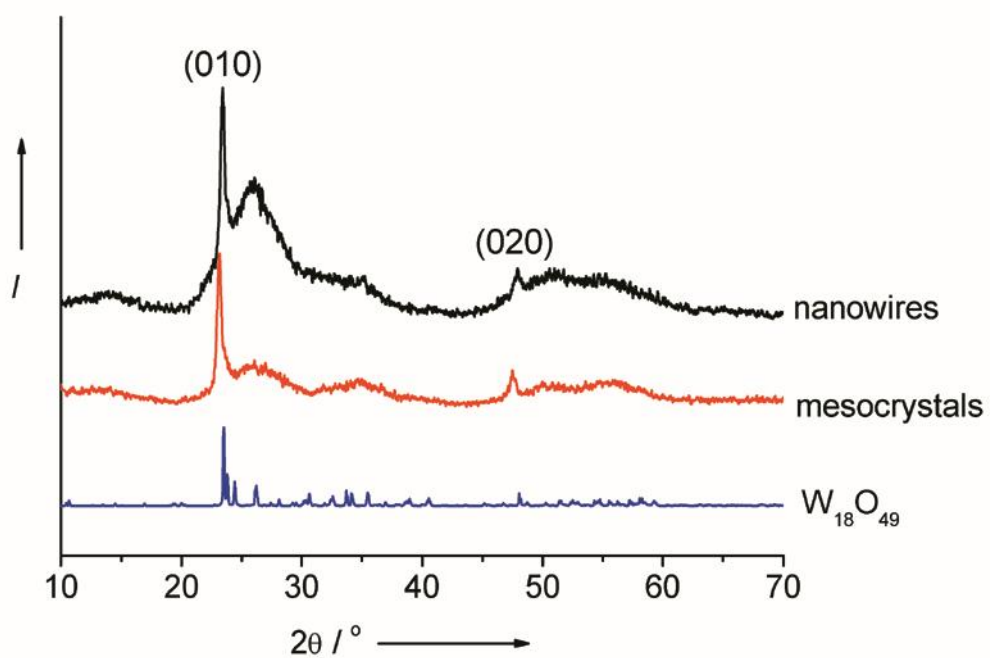

**Figure S2.** XRD pattern of mesocrystals (red line), nanowires bundles (black line) and the standard  $W_{18}O_{49}$  (JCPDF, 71-2450)

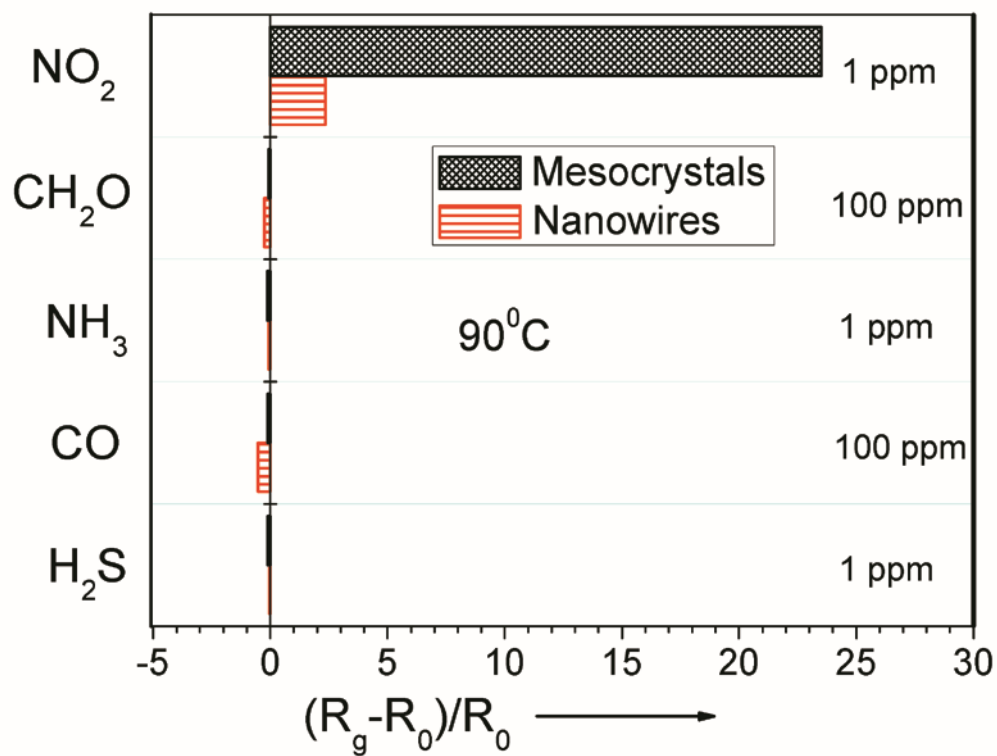

**Figure S3.** Selectivity histogram of mesocrystals and nanowires bundles towards different gases at 90 °C
